# Supplementary material for: Trastuzumab upregulates programmed death ligand-1 expression through interaction with NK cells in gastric cancer
Source: PubMed Central journal article supplement (PMC7851117; doi:10.1038/s41416-020-01138-3), 2020-10-26
Supplement: 41416_2020_1138_MOESM1_ESM.pdf [file 41416_2020_1138_MOESM1_ESM.pdf]

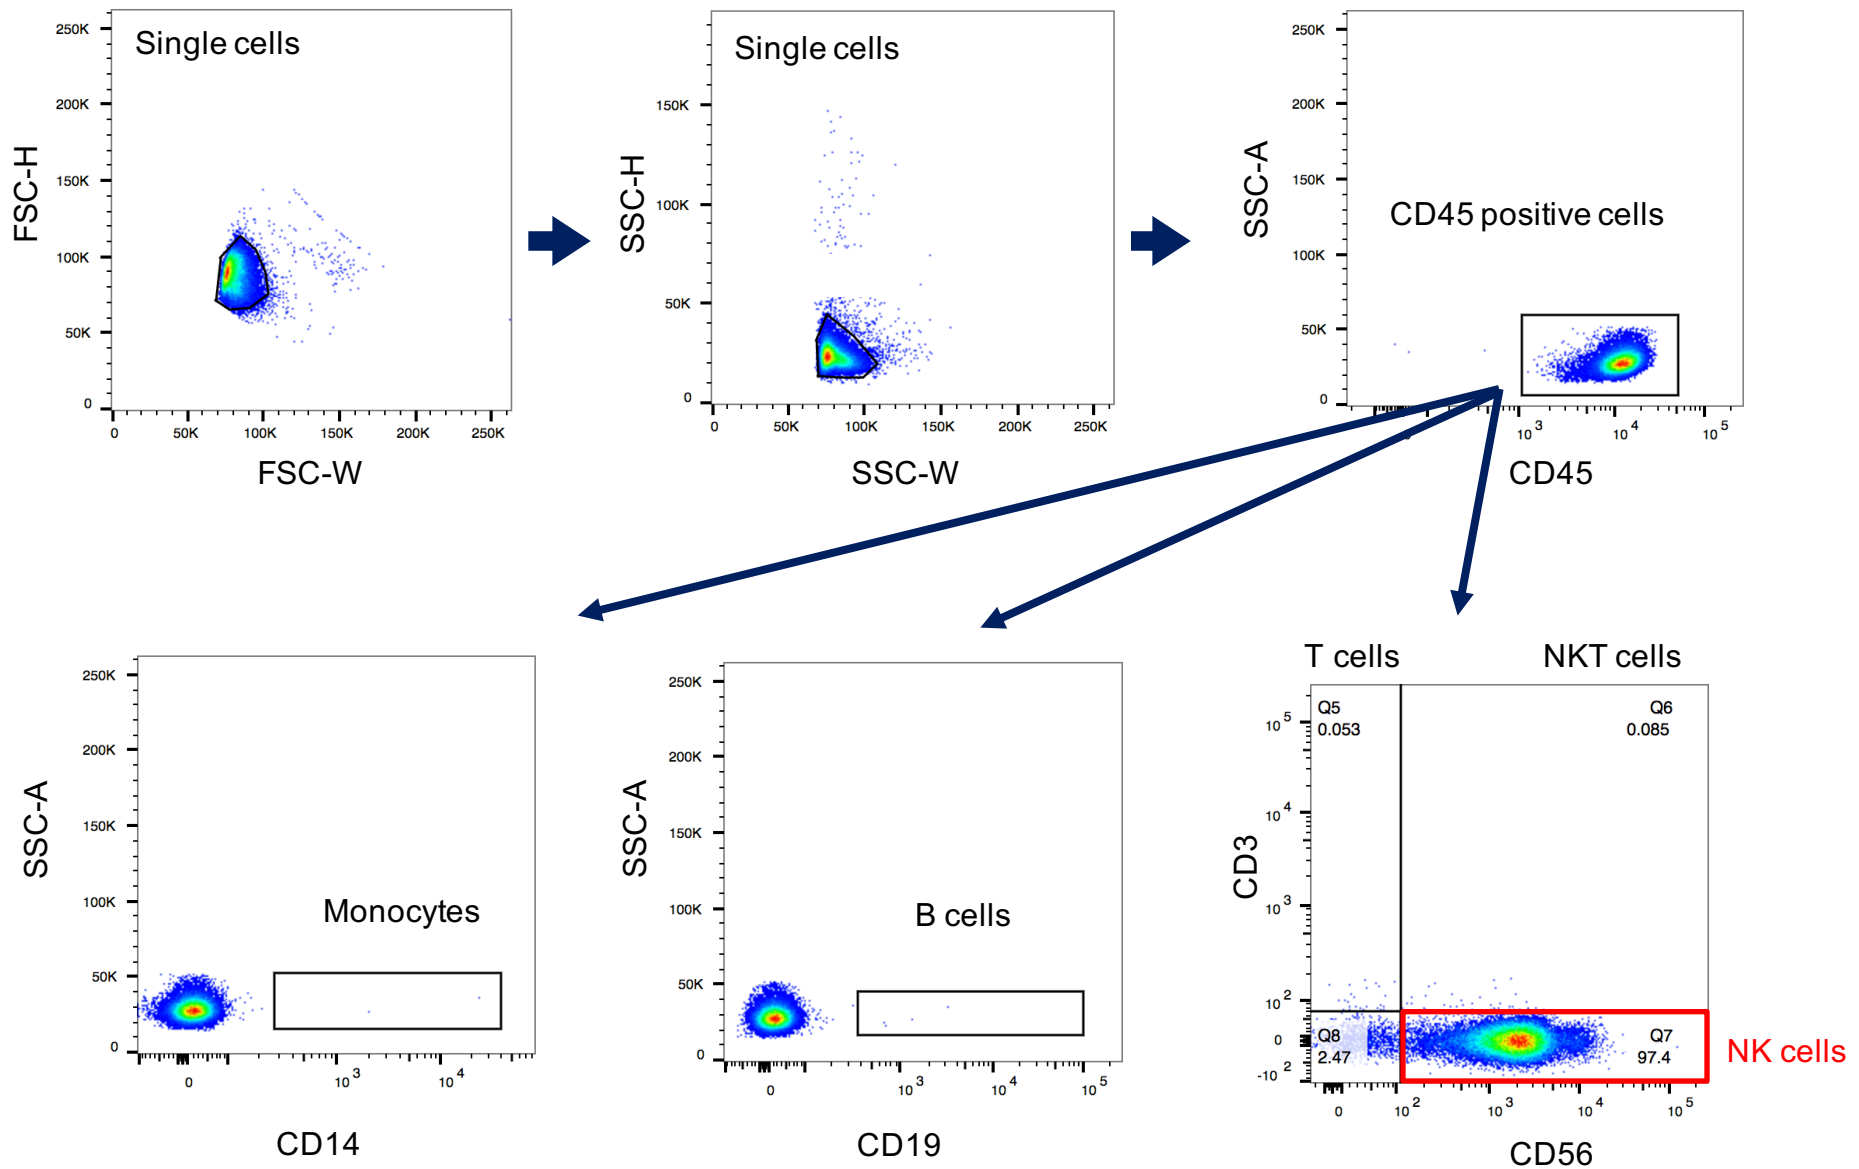

Figure S1. Gating strategy to confirm the purity of NK cells after isolation from PBMCs. After gating to single cells and CD45+ cells, NK cells were detected as CD3<sup>-</sup>/CD56<sup>+</sup> cells. The purity of NK cells was >90 % after isolation from PBMCs.

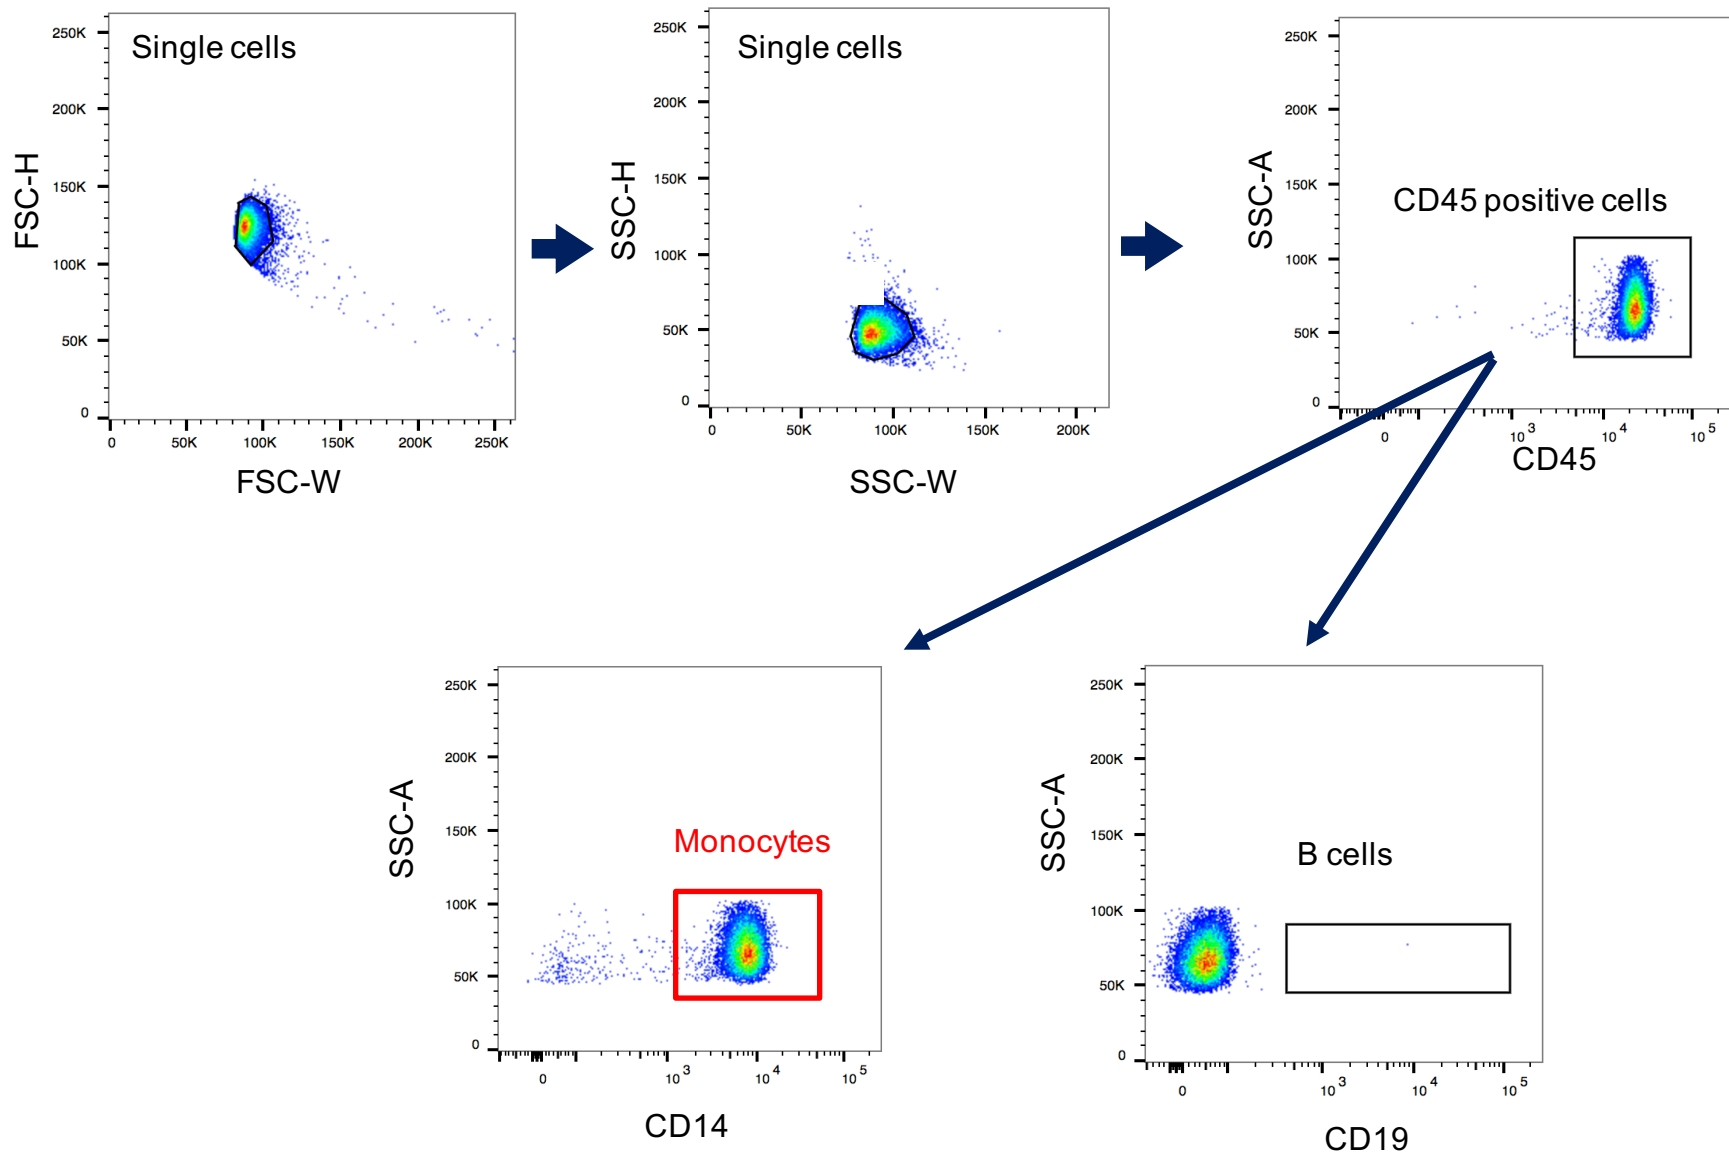

Figure S2. Gating strategy to confirm the purity of monocytes after isolation from PBMCs. After gating to single cells and CD45<sup>+</sup> cells, monocytes were detected as CD14<sup>+</sup> cells. The purity of monocytes was >90 % after isolation from PBMCs.

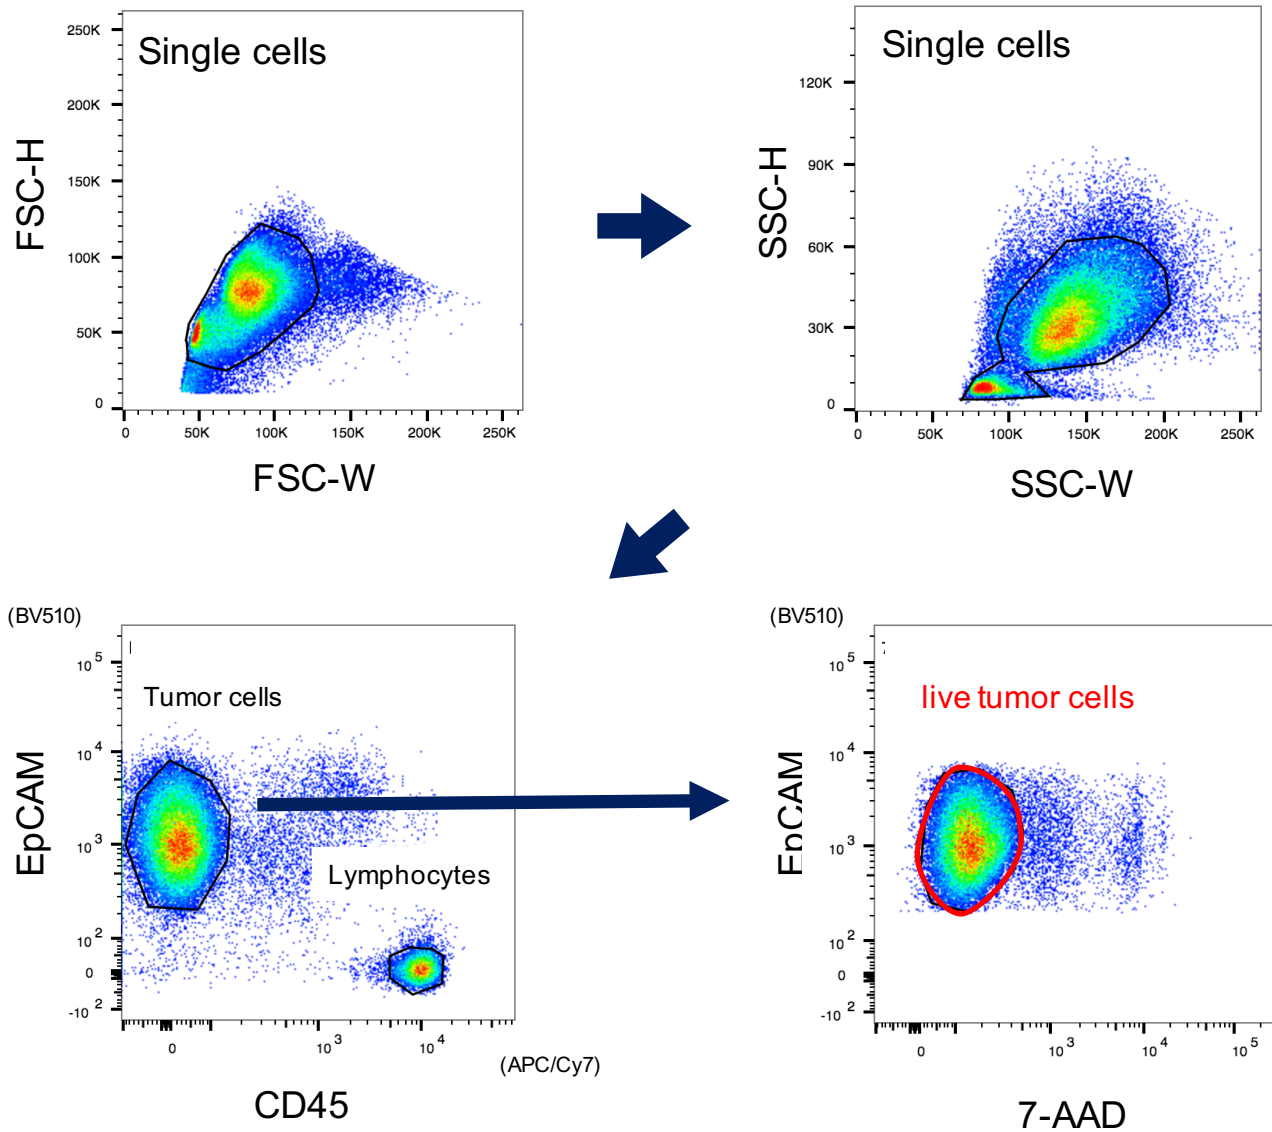

Figure S3. Gating strategy to discriminate live GC cells co-cultured with immune cells after Tmab treatment. After gating to single cells, EpCAM<sup>+</sup> cells were gated to discriminate GC cells. The 7-AAD<sup>-</sup> cells were then further gated to discriminate live GC.

**Table S1.** Multicolor panels for multicolor flow cytometry analysis

| 1. Lymphocyte surface panel |                     |        |                 |        |
|-----------------------------|---------------------|--------|-----------------|--------|
|                             | Cell surface marker | Cat.   | Isotype control | Cat.   |
| FITC                        | CD14                | 325603 | M IgG1, κ       | 400109 |
| PE                          | CD66b               | 305106 | M IgM, κ        | 401609 |
| PerCP/Cy5.5                 | CD3                 | 300429 | M IgG1, κ       | 400149 |
| PE/Cy7                      | CD4                 | 344611 | M IgG1, κ       | 400125 |
| APC                         | CD8                 | 344721 | M IgG1, κ       | 400121 |
| APC/Cy7                     | CD45                | 304014 | M IgG1, κ       | 400127 |
| BV421                       | CD56                | 318327 | M IgG1, κ       | 400157 |
| BV510                       | CD19                | 302241 | M IgG1, κ       | 400171 |
| 2. Tumor cell surface panel |                     |        |                 |        |
|                             | Cell surface marker | Cat.   | Isotype control | Cat.   |
| FITC                        | CD340 (erb/HER-2)   | 324404 | M IgG1, κ       | 400109 |
| APC                         | CD274 (PD-L1)       | 393610 | M IgG1, κ       | 400121 |
| APC/Cy7                     | CD45                | 368515 | CD45            | 368515 |
| BV510                       | EpCAM               | 324235 | EpCAM           | 324235 |
